# Supplementary material for: Water solubility and folate receptor affinity-driven plasma membrane-targeted carbon dots for cancer cell imaging
Source: Royal Society of Chemistry journal article supplement (doi:10.1039/d4ra03337j), 2024-01-01
Supplement: d4ra03337j1.pdf [file d4ra03337j1.pdf]

## Supporting Information

### **Water Solubility and Folate Receptor Affinity-Driven Plasma Membrane-Targeted Carbon Dots for Cancer Cell Imaging**

Tian Jin,<sup>a</sup> Longdi Zhang,<sup>a</sup> Yudie Zhao,<sup>a</sup> Jianping Wang,<sup>\*b</sup> Zhengjie Liu,<sup>a</sup> Ruilong Zhang,<sup>a</sup> Junlong Geng,<sup>a</sup> Guangmei Han,<sup>\*a</sup> and Zhongping Zhang<sup>a</sup>

*<sup>a</sup>Institute of Physical Science and Information Technology, School of Chemistry and Chemical Engineering, Information Materials and Intelligent Sensing Laboratory of Anhui Province, Key Laboratory of Structure and Functional Regulation of Hybrid Materials of Ministry of Education, Anhui University, Hefei, Anhui 230601, China.*

*<sup>b</sup>Zhejiang Provincial Key Laboratory of Biometrology and Inspection & Quarantine, College of Life Sciences, China Jiliang University, Hangzhou, 310018, China.*

\* Corresponding author. E-mail: 18a0905114@cjlu.edu.cn; gmhan@ahu.edu.cn;

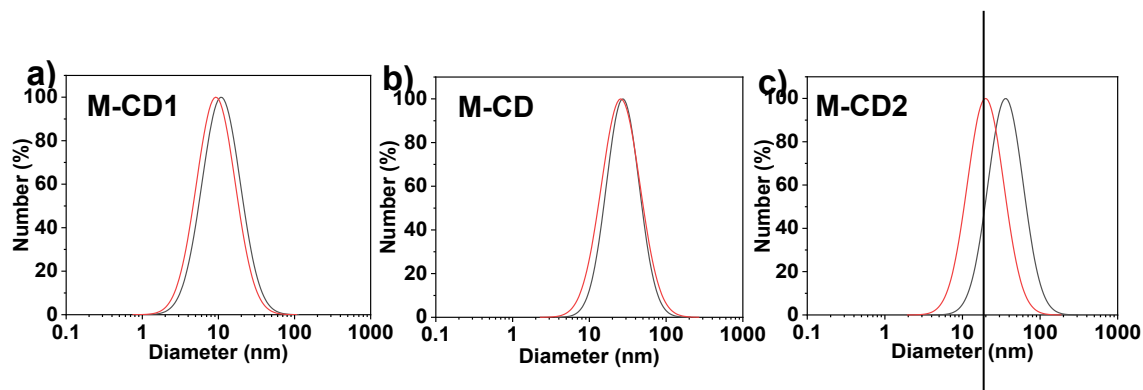

**Figure S1.** Hydrodynamic diameters of M-CD1, M-CD and M-CD2 were recorded using dynamic light scattering (DLS) in aqueous solution. Black: fresh prepared M-CDs aqueous solution (20  $\mu\text{g/mL}$ ). Red: M-CDs aqueous solution left for 30 days.

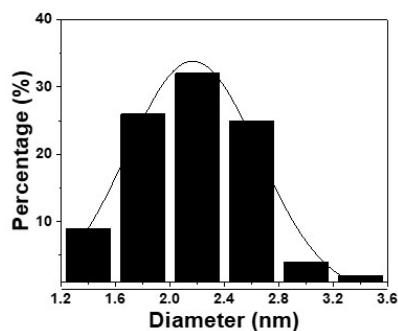

**Figure S2.** The particles size distribution of M-CD (1:10).

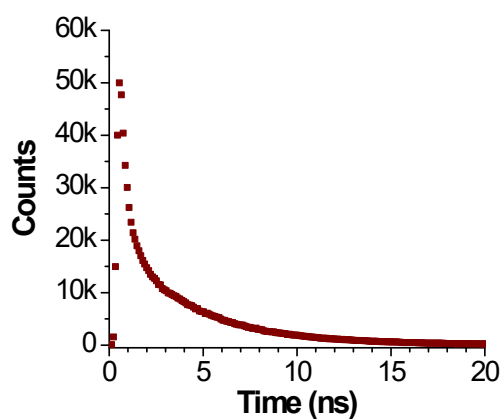

**Figure S3.** Fluorescence decay profiles of M-CD.

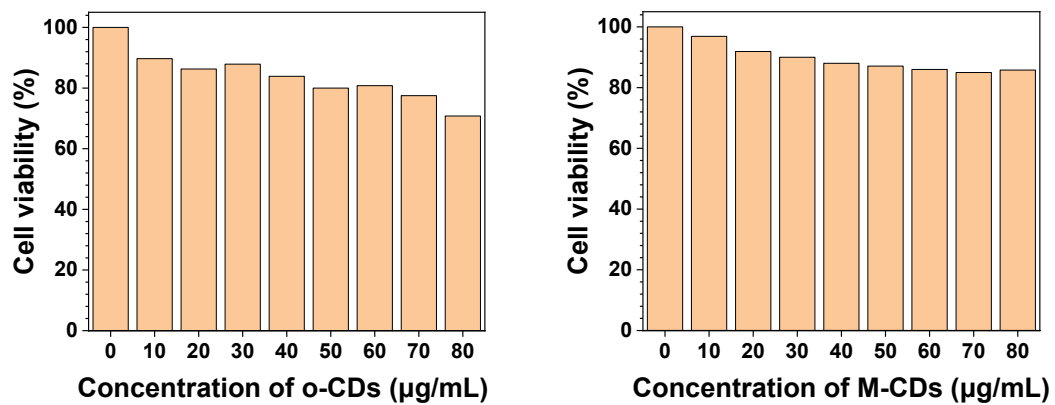

**Figure S4.** Viability of HepG2 cells in the presence of o-CDs or M-CD (at a 1:10 ratio) was measured using the MTT assay.

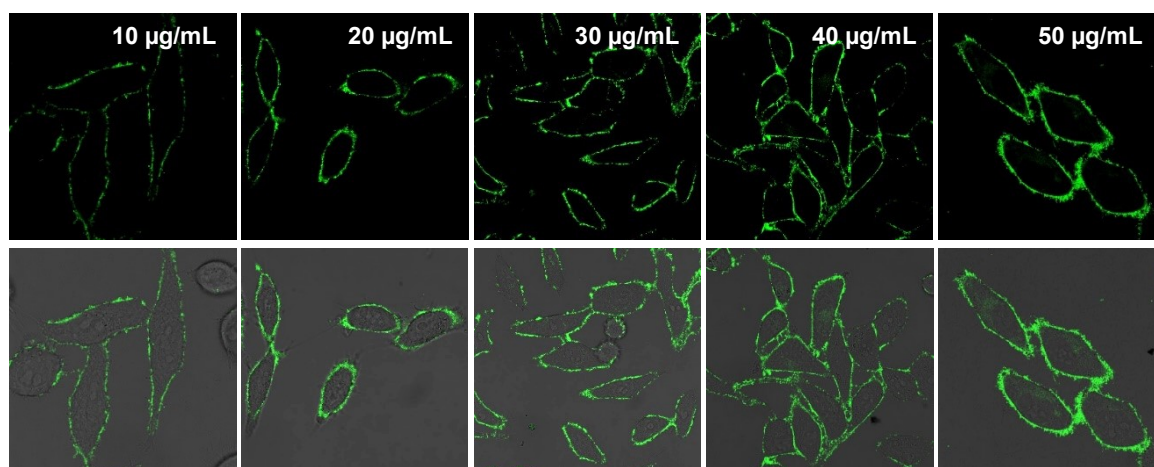

**Figure S5.** Fluorescent confocal images of HepG2 cells co-incubated with different concentrations of the M-CD.

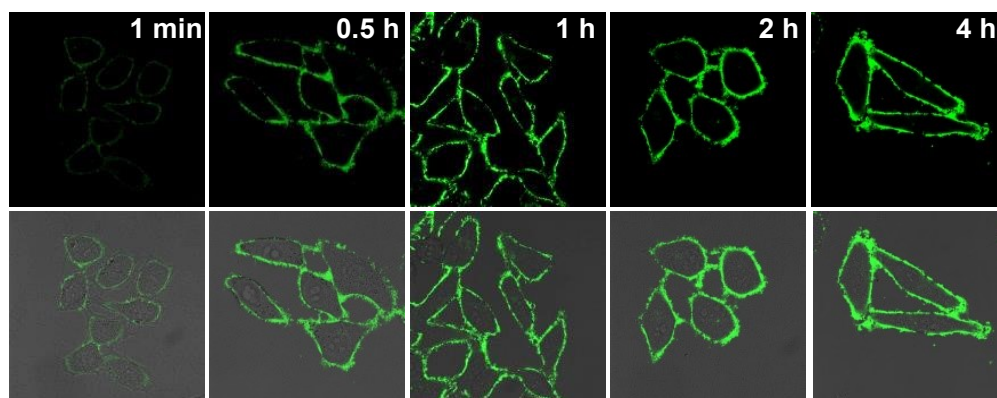

**Figure S6.** Fluorescent confocal images of HepG2 cells co-incubated with 20  $\mu\text{g/mL}$  M-CD for different times.

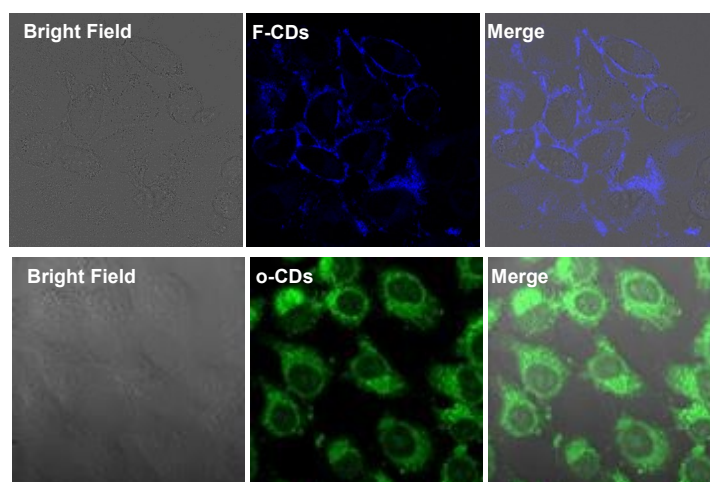

**Figure S7.** Fluorescent confocal images of HeLa cells co-incubated with 20  $\mu\text{g/mL}$  F-CDs or o-CDs for 1 hour. The images were taken under confocal microscope with an excitation of 405 nm and emission windows were 450-550 nm and 500-650 nm for F-CD and M-CD, respectively.

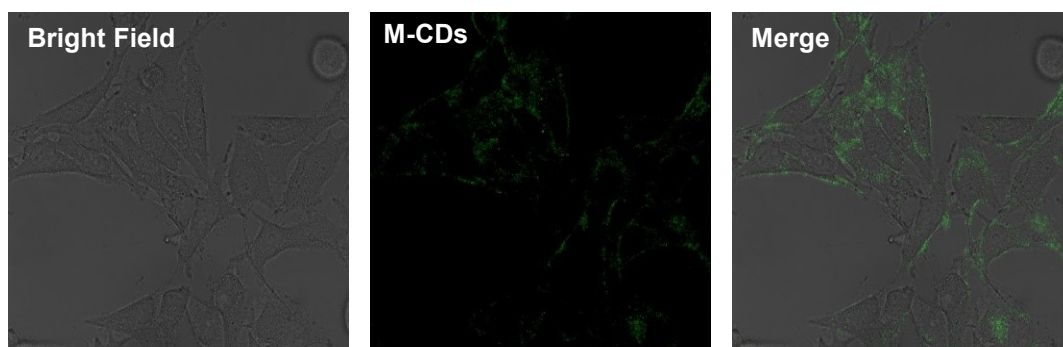

**Figure S8.** Fluorescent confocal images of folic acid-saturated HepG2 cells. The cells were pretreated with folic acid for 2 hours and then co-incubated with 20  $\mu\text{g}/\text{mL}$  M-CD for 1 hour.

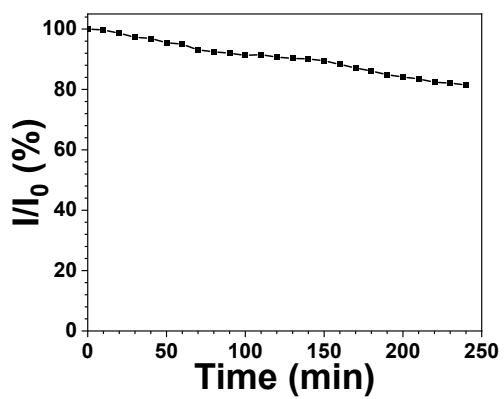

**Figure S9.** The photostability of M-CDs under 365 nm UV irradiation.

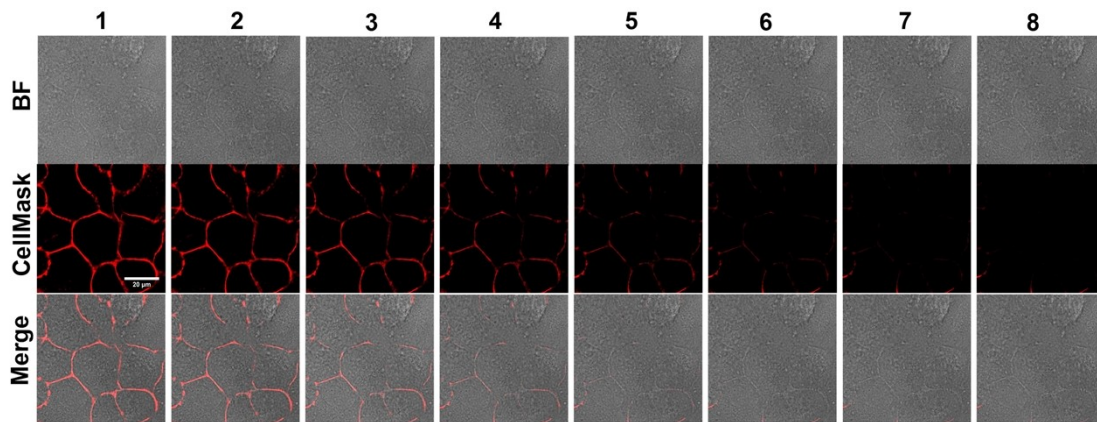

**Figure S10.** The photostability of CellMask Deep Red measured by confocal time-lapse imaging.

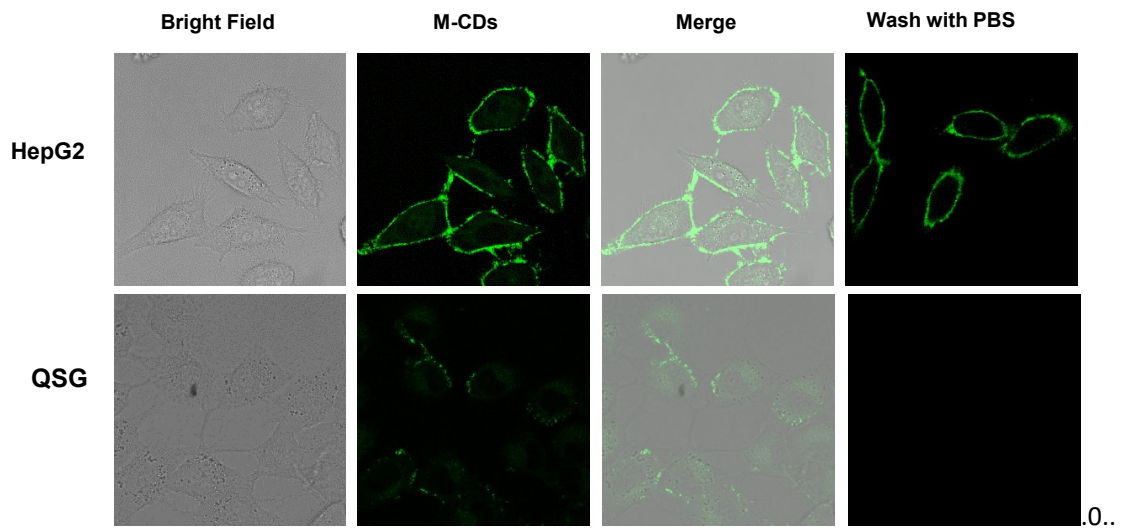

**Figure S11.** Fluorescent confocal images of HepG2 and QSG cells co-incubated with 20  $\mu\text{g}/\text{mL}$  M-CD for 1 hour before and after PBS wash.

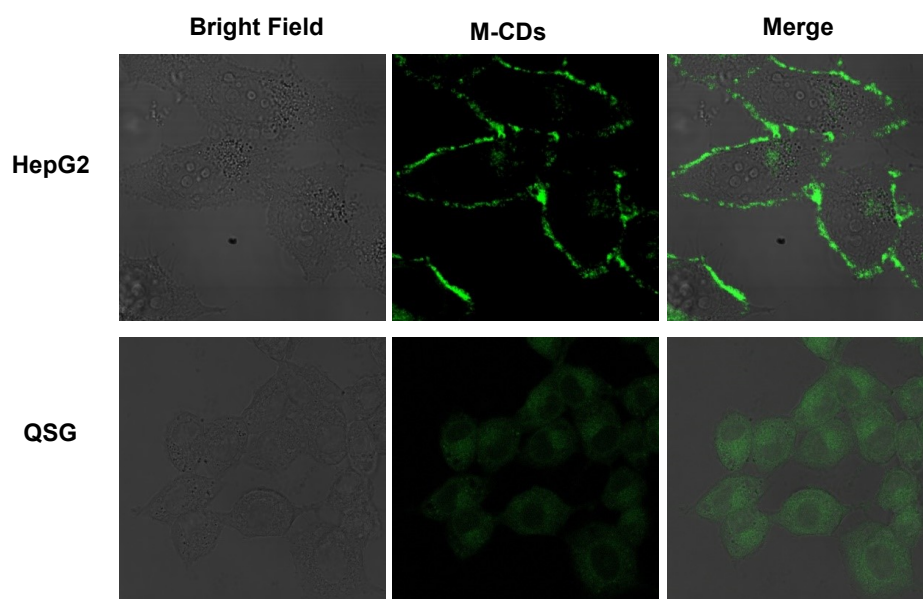

**Figure S12.** Fluorescent confocal images of fixed HepG2 and QSG cells co-incubated with 20  $\mu\text{g}/\text{mL}$  M-CD for 1 hour.
